# Supplementary material
Source: MDPI journal article supplement (https://www.mdpi.com/2305-7084/5/3/51)
Supplement: s1 [file s1]

# Promising Isotope Effect in Pd<sub>77</sub>Ag<sub>23</sub> for Hydrogen Separation

Francesco Trequattrini<sup>1,2</sup>, Oriele Palumbo<sup>2</sup>, Silvano Tosti<sup>3</sup>, Alessia Santucci<sup>3</sup> and Annalisa Paolone<sup>2,\*</sup>

<sup>1</sup> Dipartimento di Fisica, Sapienza Università di Roma, Piazzale A. Moro 5, I-00185 Rome, Italy; francesco.trequattrini@roma1.infn.it

<sup>2</sup> Istituto dei Sistemi Complessi, Consiglio Nazionale delle Ricerche, Piazzale A. Moro 5, I-00185 Rome, Italy; oriele.palumbo@roma1.infn.it

<sup>3</sup> Dipartimento Fusione e Tecnologie per la Sicurezza Nucleare, ENEA, Via E. Fermi 45, I-00044 Frascati, Rome, Italy; silvano.tosti@enea.it (S.T.) alessia.santucci@enea.it (A.S.)

\* Correspondence: annalisa.paolone@roma1.infn.it

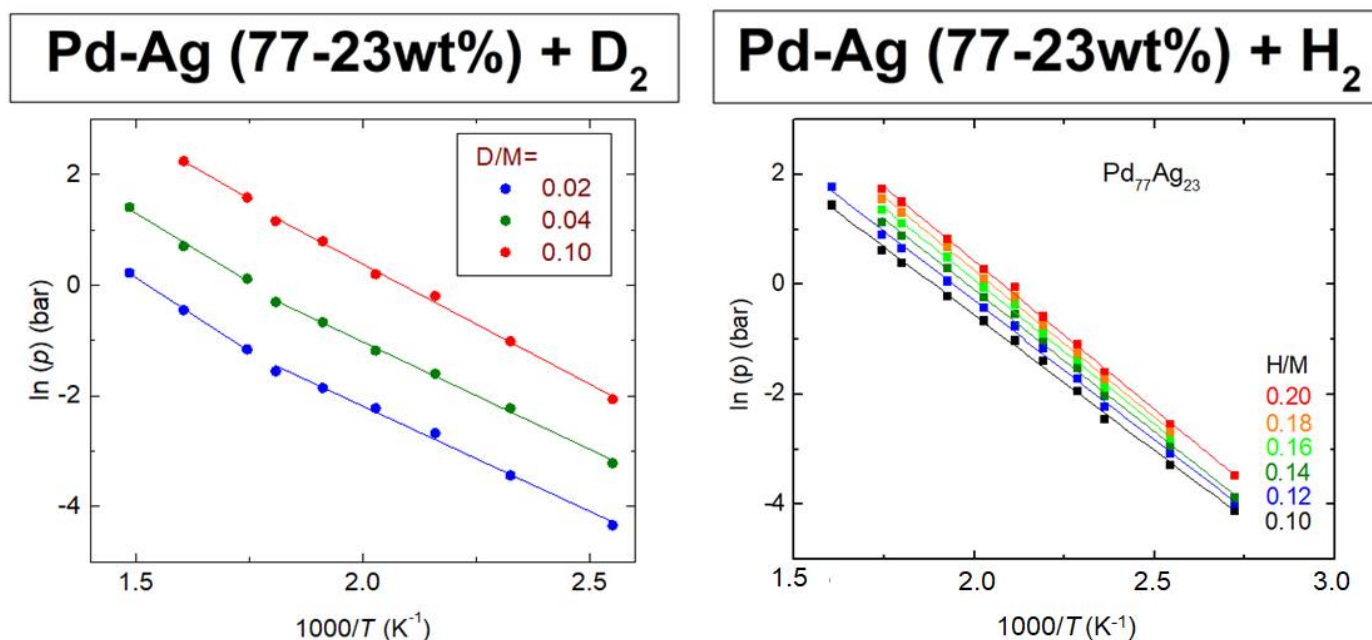

**Figure S1.** Comparison of the Van't Hoff plots for Pd<sub>77</sub>Ag<sub>23</sub>-D (present work) and Pd<sub>77</sub>Ag<sub>23</sub>-H systems (Ref. [1]).

## References

1. Paolone, A.; Tosti, S.; Santucci, A.; Palumbo, O.; Trequattrini, F. Hydrogen and deuterium solubility in commercial Pd–Ag alloys for hydrogen purification. *ChemEngineering* **2017**, *1*, 14.
